# Supplementary material
Source: publisher figshare collection journal article supplement (https://sage.figshare.com/ndownloader/files/23581448)
Supplement: Supplementary file 1 [file 23581448]

**Ethical Statement**

Our study did not require an ethical board approval because it did not contain human or animal trials.
